# Supplementary material for: Cerium anomaly as a tracer for paleo-oceanic redox conditions: A thermodynamics-based Ce oxidation modeling approach
Source: Frontiers journal article supplement (doi:10.3389/feart.2022.927826), 2022-09-06
Supplement: Data_Sheet_1.xlsx [file Data_Sheet_1.xlsx]

## Sheet: Table S2
Table S2. Dissolved REY concentrations (pmol/kg)			43°04N， 34E	Black Sea	Station No. 32212
Depth	Salinity	Temperature	Dissolved O2		PO4	Alkalinity	Ce		Nd	pH	H+	∂1	HCO3-	∂2	CO32-	Ce	log{CCe}	pO2	log(PO2)	P1	P2	P3	P4	P5	P6	P7	P8	P9	P10	P11	P3 accuracy	P9 accuracy
m	psu	℃	ml/l		uM	µeq/L					mol/L		mol/L		mol/L	(mol/L)				Model calculated log log{CCe}											%	%
6	18.1956	14.2823	6.5648		0.1807		22.2		18.6							2.22e-11	-10.6536	0.212457	-0.672729
15	18.232	12.6138	6.7432		0.183	2.99	18.4		18.6							1.84e-11	-10.7352	0.21823	-0.661085
31	18.3446	9.4176	6.7645		0.2084		16.8		19.1	8.44	3.63078e-09	0.821404		0.175613		1.68e-11	-10.7747	0.21892	-0.659715	-5.92976	-15.5098	-9.02976	-2.02976	-4.32976	-8.95507
50	18.7109	7.7146	5.4991		0.3676	3.05	5.8		18.6	8.39	4.0738e-09	0.837086	2.66505e-06	0.159504	5.07814e-07	5.8e-12	-11.2366	0.177968	-0.749659	-6.21916	-15.7992	-9.31916	-2.31916	-4.61916	-8.78259	-18.8791	-23.0191	-10.1671	-26.9071	-18.8245	8168.27	1073.54
65	19.152	7.7117	3.7804		0.6011		2.6		14.4							2.6e-12	-11.585	0.122345	-0.912413
70	19.2979	7.7603	3.2489		0.6772		2.8		14.7							2.8e-12	-11.5528	0.105144	-0.978214
76	19.4338	7.8071	2.8196		0.736	3.07	1.6		12.2	8.37	4.2658e-09	0.843003	2.70148e-06	0.153401	4.91589e-07	1.6e-12	-11.7959	0.0912508	-1.03976	-6.64594	-16.2259	-9.74594	-2.74594	-5.04594	-8.65006	-18.7607	-22.9007	-10.0628	-26.8028	-18.7927	11118.7	5309.1
81	19.5522	7.8645	2.4765		0.7877		2.1		11.5							2.1e-12	-11.6778	0.0801471	-1.09611
86	19.7	7.9295	2.1607		0.8524		3.1		11.9							3.1e-12	-11.5086	0.0699268	-1.15536
91	19.8348	7.9883	1.8791		0.9294		9.7		12.9							9.7e-12	-11.0132	0.0608134	-1.216
96	19.9609	8.0469	1.6058		1.1151		13.7		14.3							1.37e-11	-10.8633	0.0519686	-1.28426
100	20.0764	8.107	1.3981		1.3949		16.5		15.2							1.65e-11	-10.7825	0.0452468	-1.34441
105							18.8		15.5							1.88e-11	-10.7258
110							27.5		18.4							2.75e-11	-10.5607
115							31.1		19.3							3.11e-11	-10.5072
120							55.1		27.1							5.51e-11	-10.2588
125	20.5297	8.3178	0.6525		2.7881		63.1		29.9							6.31e-11	-10.2	0.0211169	-1.67537
130							57.4		29.2							5.74e-11	-10.2411
150	20.911	8.4903	0.3395		3.616	3.07	106		47.8	8.08	8.31764e-09	0.907735	2.90892e-06	0.0847148	2.71476e-07	1.06e-10	-9.97469	0.0109873	-1.95911	-3.72492	-13.3049	-6.82492	0.175084	-2.12492	-7.55022	-17.9187	-22.0587	-9.47866	-26.2187	-18.4384	141081	213.355
180	21.1838	8.5883	0.2592		4.306	3.13	144.6		59.3	8.12	7.58578e-09	0.90097	2.94367e-06	0.0921956	3.01224e-07	1.446e-10	-9.83983	0.0083885	-2.07632	-3.68075	-13.2608	-6.78075	0.219247	-2.08075	-7.64092	-17.9643	-22.1043	-9.47904	-26.219	-18.4681	114472	129.503
500	22.0247	8.882	0.1845		6.1443	3.69	180.9		76.6							1.809e-10	-9.74256	0.00597098	-2.22395
800	22.2191	8.9179	0.0319		6.7069	3.8	141.8		64.1							1.418e-10	-9.84832	0.00103238	-2.98616
1500	22.3171	9.0267	0		6.9324		104.9		50.5							1.049e-10	-9.97922
2153	22.3296	9.0936	0		8.4894		96.3		48.1							9.63e-11	-10.0164
2174							89.6		45.3							8.96e-11	-10.0477
2185	22.3349	9.1012	0		8.4876		52.9		47.6							5.29e-11	-10.2765
Salinity, dissolved oxygen, phosphate, aklinitey and pH are estimated from WOA 13

## Sheet: Table S1
Table S1. Dissolved Rare Earth Elements and Hydrographic Properties in the South China Seaa
Depth	Salinity	Temperatucre	Dissolved O2	SiO2	PO4	Alkalinity	Ce	Pr	Nd	pH	H+	∂1	HCO3-	∂2	CO32-	Ce	log{CCe}	pO2	log (PO2)	P1	P2	P3	P4	P5	P6	P7	P8	P9	P10	P11	P3 accuracy	P11 accuracy
m	psu	℃	ml/l	uM	uM	µeq/L	pmol/kg	pmol/kg	pmol/kg		mol/L		mol/L		mol/L	(mol/L)				Model calculated log log{CCe}											%	%
0	33.067	26.8	4.5368	1.9	0.15	2204	8.09	2.95	13.9	8.253	5.5847e-09	0.873683	0.00201002	0.121438	0.000279383	8.09e-12	-11.0921	0.34058	-0.467781	-5.73411	-15.3141	-8.83411	-1.83411	-4.13411	-8.44205	-15.7981	-19.9381	-4.34555	-21.0856	-12.9325	18011.1	-98.5561
50	33.208	26.21	4.579	1.7	0.1	2282	9.31	3.09	14.2	8.273	5.33335e-09	0.868901	0.00206976	0.126465	0.000301245	9.31e-12	-11.0311	0.347826	-0.458638	-5.73539	-15.3154	-8.83539	-1.83539	-4.13539	-8.50434	-15.8277	-19.9677	-4.3424	-21.0824	-12.9271	15591.3	-98.7295
100	34.579	18.61	3.463	13.3	0.87	2290	6.61	2.26	10.4	8.122	7.55092e-09	0.900615	0.00215283	0.0925847	0.000221314	6.61e-12	-11.1798	0.275362	-0.560095	-5.40577	-14.9858	-8.50577	-1.50577	-3.80577	-8.02598	-15.4832	-19.6232	-4.13186	-20.8719	-12.7419	47108.9	-97.2589
297	34.476	11.82	2.6915	39.2	1.58	2326	3.2	2.54	11.7	7.922	1.19674e-08	0.928651	0.00225474	0.0602355	0.00014625	3.2e-12	-11.4949	0.188406	-0.724906	-5.07962	-14.6596	-8.17962	-1.17962	-3.47962	-7.38477	-15.0219	-19.1619	-3.85048	-20.5905	-12.5017	206546	-90.1566
398	34.437	10.12	2.361	52.5	1.83	2312	3.01	2.78	12.9	7.85	1.41254e-08	0.935384	0.00225742	0.0514032	0.000124054	3.01e-12	-11.5214	0.177536	-0.750713	-4.88376	-14.4638	-7.98376	-0.983755	-3.28376	-7.16232	-14.871	-19.011	-3.771	-20.511	-12.4287	344788	-87.6189
495	34.426	8.75	2.1429	67	2.08	2362	3.31	3	14.3	7.865	1.36458e-08	0.934116	0.00230311	0.0531374	0.000131013	3.31e-12	-11.4802	0.163043	-0.787697	-4.87825	-14.4582	-7.97825	-0.978248	-3.27825	-7.19808	-14.883	-19.023	-3.75935	-20.4993	-12.4263	317532	-88.6785
795	34.476	5.75	1.9388	106.1	2.46	2428	5.51	3.12	14.6	7.668	2.14783e-08	0.94552	0.00239637	0.034172	8.66072e-05	5.51e-12	-11.2588	0.144928	-0.838849	-4.05314	-13.6331	-7.15314	-0.153136	-2.45314	-6.59429	-14.459	-18.599	-3.51508	-20.2551	-12.1948	1.27549e+06	-88.4107
997	34.526	4.53	2.0173	127.1	2.62	2406	8.03	4.26	19.8	7.673	2.12324e-08	0.945366	0.00237427	0.0345621	8.6802e-05	8.03e-12	-11.0953	0.141304	-0.849844	-3.90182	-13.4818	-7.00182	-0.00182334	-2.30182	-6.60654	-14.4703	-18.6103	-3.52538	-20.2654	-12.2078	1.24001e+06	-92.2831
1488	34.595	2.93	2.2297	152.6	2.7	2417	8.96	5.38	24.7	7.657	2.20293e-08	0.945835	0.00238631	0.0333285	8.40866e-05	8.96e-12	-11.0477	0.163043	-0.787697	-3.82177	-13.4018	-6.92177	0.0782322	-2.22177	-6.57408	-14.4516	-18.5916	-3.52052	-20.2605	-12.1874	1.33626e+06	-92.7515
1981	34.61	2.52	2.3085	155.8	2.66	2457	11.95	6.58	29.6	7.665	2.16272e-08	0.945609	0.00242522	0.03394	8.70465e-05	1.195e-11	-10.9226	0.173913	-0.759668	-3.72772	-13.3077	-6.82772	0.172285	-2.12772	-6.60508	-14.4676	-18.6076	-3.52148	-20.2615	-12.1814	1.24418e+06	-94.4889
2473	34.618	2.39	2.5016	156.3	2.65	2455	12.85	7.21	32.9	7.669	2.14289e-08	0.945489	0.00242294	0.0342497	8.77693e-05	1.285e-11	-10.8911	0.181159	-0.741939	-3.71261	-13.2926	-6.81261	0.187388	-2.11261	-6.62152	-14.4804	-18.6204	-3.53073	-20.2707	-12.1862	1.19798e+06	-94.9315
2963	34.62	2.37	2.5402	155.2	2.6	2458	5.99	6.48	30.6	7.676	2.10863e-08	0.94527	0.00242534	0.0347981	8.92837e-05	5.99e-12	-11.2226	0.194203	-0.711744	-4.07264	-13.6526	-7.17264	-0.172637	-2.47264	-6.65006	-14.5015	-18.6415	-3.54442	-20.2844	-12.1924	1.12175e+06	-89.2794
3941	34.613	2.43	2.6435	154.3	2.61	2455	5.58	6.37	30	7.677	2.10378e-08	0.945237	0.00242229	0.0348771	8.93772e-05	5.58e-12	-11.2534	0.195652	-0.708515	-4.10724	-13.6872	-7.20724	-0.207237	-2.50724	-6.65387	-14.5049	-18.6449	-3.54732	-20.2873	-12.1944	1.11196e+06	-88.547
4182	34.621	2.46	2.6495	152.8	2.63	2456	6.25	6.6	30.9	7.68	2.0893e-08	0.945138	0.00242303	0.0351152	9.0024e-05	6.25e-12	-11.2041	0.195652	-0.708515	-4.06699	-13.647	-7.16699	-0.166991	-2.46699	-6.66287	-14.5108	-18.6508	-3.55005	-20.2901	-12.1972	1.08915e+06	-89.839
4231	34.623	2.46	2.5004	153.5	2.65	2436	6.02	6.37	30.3	7.691	2.03704e-08	0.944754	0.00240232	0.0360013	9.15441e-05	6.02e-12	-11.2204	0.195652	-0.708515	-4.11627	-13.6963	-7.21627	-0.216275	-2.51627	-6.69587	-14.5365	-18.6765	-3.56851	-20.3085	-12.2156	1.00945e+06	-89.8897
Dissolved oxygen is estimated from WOA 13
